# Supplementary material for: Revealing the role of aniline in assisting SnO2 electrocatalytic CO2 reduction to HCOOH: via the perspective of the reaction pathway
Source: Royal Society of Chemistry journal article supplement (doi:10.1039/d3ta04368a), 2023-01-01
Supplement: d3ta04368a1.pdf [file d3ta04368a1.pdf]

## Supporting Information

### Revealing the role of aniline in assisting SnO<sub>2</sub> electrocatalytic CO<sub>2</sub> reduction to HCOOH: via the perspective of reaction pathway

Yuning Zhang,<sup>ab</sup> Hao Jiang,<sup>ac</sup> Kangpeng Wang,<sup>b</sup> Dongfang Niu,<sup>a\*</sup> and Xinsheng Zhang<sup>a\*</sup>

<sup>a</sup> State Key Laboratory of Chemical Engineering, School of Chemical Engineering, East China University of Science and Technology, Shanghai 200237, China

<sup>b</sup> State Key Laboratory of High Field Laser Physics and CAS Center for Excellence in Ultra-intense Laser Science, Shanghai Institute of Optics and Fine Mechanics, Chinese Academy of Sciences, Shanghai 200237, China

<sup>c</sup> Petroleum Processing Research Center, School of Chemical Engineering, East China University of Science and Technology, Shanghai 200237, China

\*Corresponding author: dfniu@ecust.edu.cn (D. Niu); xszhang@ecust.edu.cn (X. Zhang)

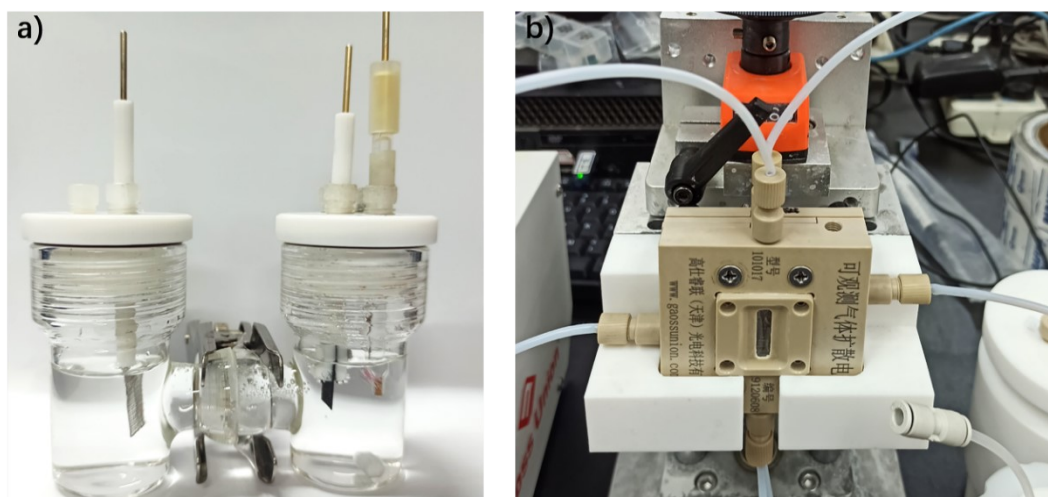

Fig. S1. Pictures of (a) H-type cell and (b) flow cell with an observable gas diffusion electrode.

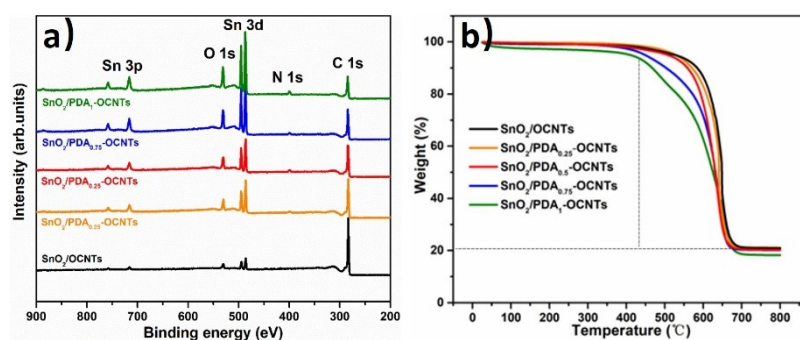

Fig. S2. (a) XPS survey spectra of SnO<sub>2</sub>/OCNTs, SnO<sub>2</sub>/PDA<sub>0.25</sub>-OCNTs, SnO<sub>2</sub>/PDA<sub>0.5</sub>-OCNTs, SnO<sub>2</sub>/PDA<sub>0.75</sub>-OCNTs, and SnO<sub>2</sub>/PDA<sub>1</sub>-OCNTs. (b) Weight loss curves of SnO<sub>2</sub>/OCNTs, SnO<sub>2</sub>/PDA<sub>0.25</sub>-OCNTs, SnO<sub>2</sub>/PDA<sub>0.5</sub>-OCNTs, SnO<sub>2</sub>/PDA<sub>0.75</sub>-OCNTs, and SnO<sub>2</sub>/PDA<sub>1</sub>-OCNTs.

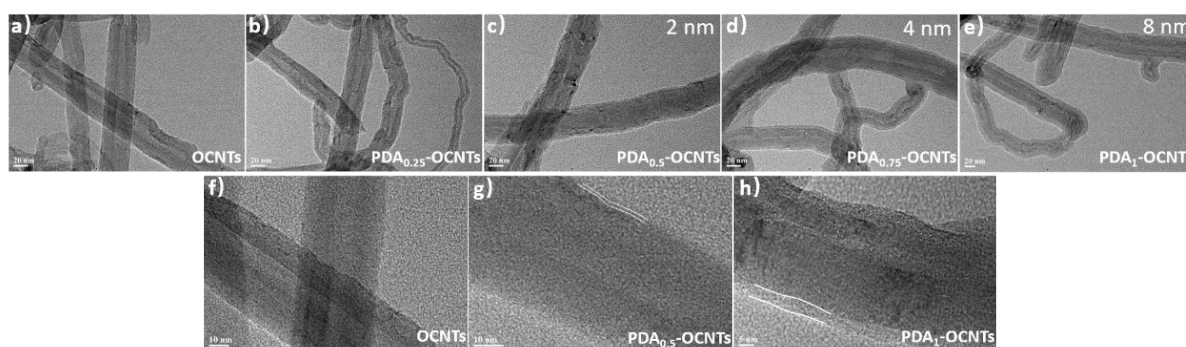

Fig. S3. TEM images of (a) OCNTs, (b) PDA<sub>0.25</sub>-OCNTs, (c) PDA<sub>0.5</sub>-OCNTs, (d) PDA<sub>0.75</sub>-OCNTs, and (e) PDA<sub>1</sub>-OCNTs. HR-TEM images of (a) OCNTs, (b) PDA<sub>0.5</sub>-OCNTs, (c) PDA<sub>1</sub>-OCNTs.

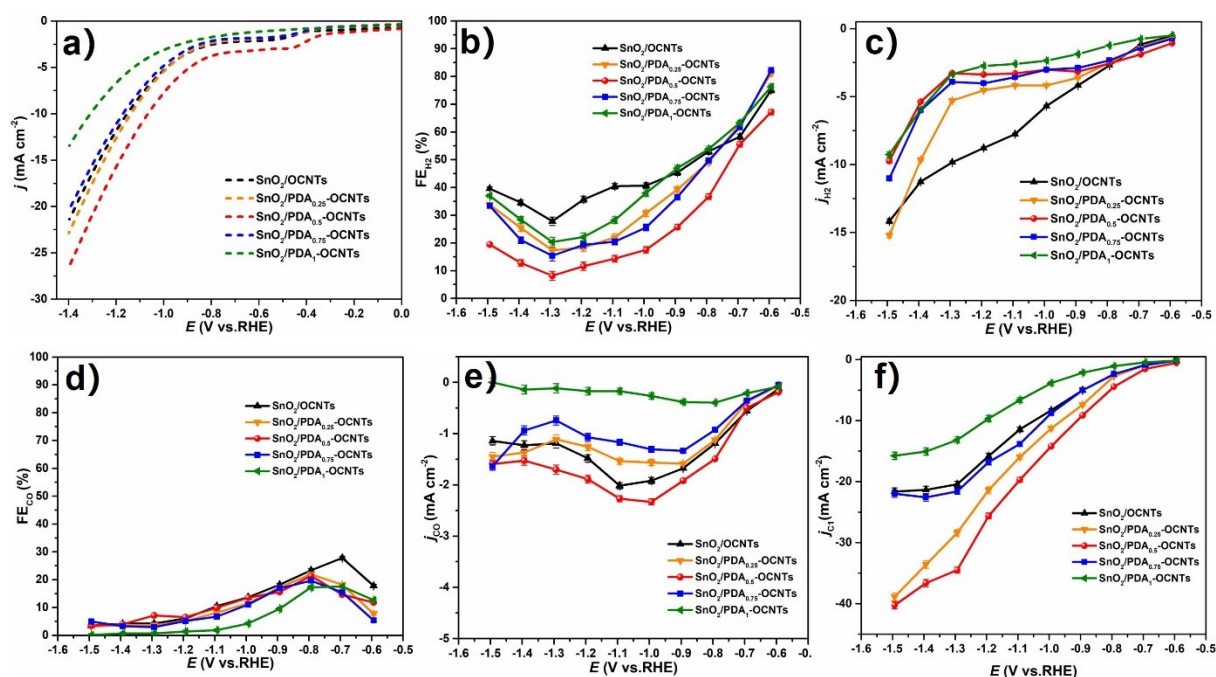

Fig. S4. (a) LSV curves obtained in 0.1 M  $\text{KHCO}_3$  electrolytes saturated with  $\text{N}_2$ , (b) Faradaic efficiencies of  $\text{H}_2$ , (c) partial current densities of  $\text{H}_2$ , (d) Faradaic efficiencies of  $\text{CO}$ , (e) partial current densities of  $\text{CO}$ , and (f) current densities of total C1 products over as-prepared catalysts at different applied potentials.

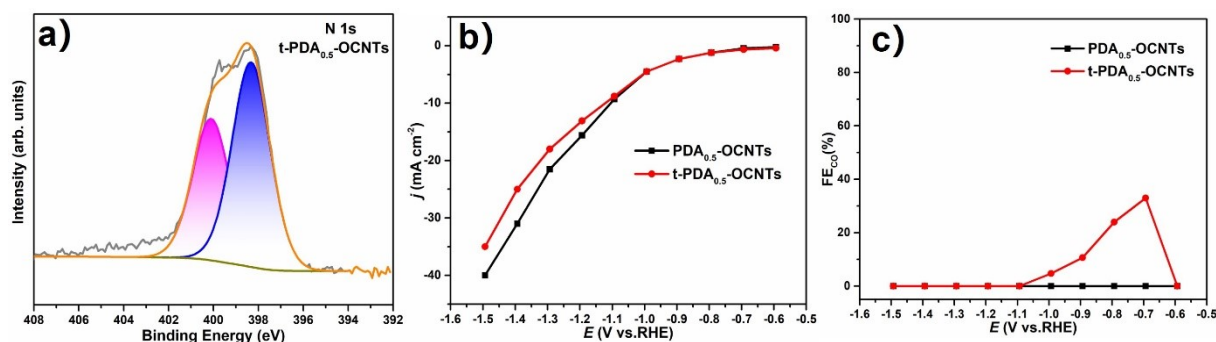

Fig. S5. (a) N 1s XPS spectrum of  $\text{t-PDA}_{0.5}\text{-OCNTs}$ . (b) Current densities and (c) Faradaic efficiencies of  $\text{PDA}_{0.5}\text{-OCNTs}$  and  $\text{t-PDA}_{0.5}\text{-OCNTs}$  at different applied potentials.

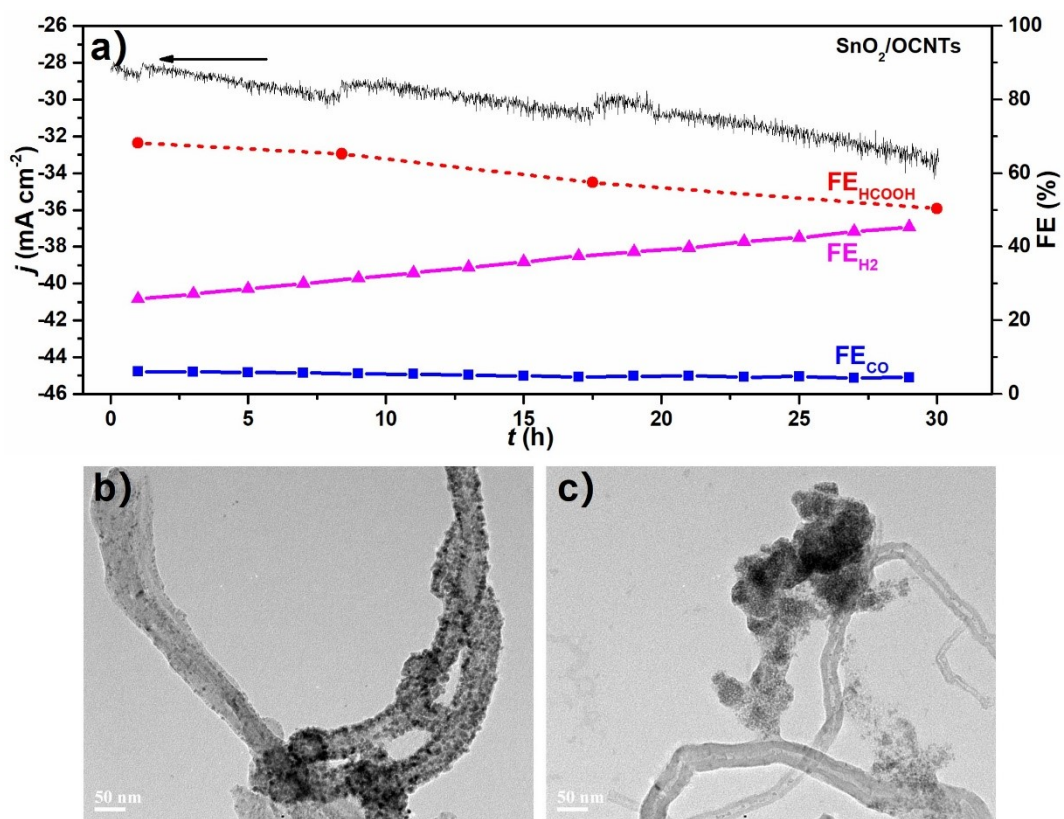

Fig. S6. (a) Stability tests of SnO<sub>2</sub>/OCNTs at -1.29 V. TEM images of (b) SnO<sub>2</sub>/PDA<sub>0.5</sub>-OCNTs and (c) SnO<sub>2</sub>/OCNTs after stability tests.

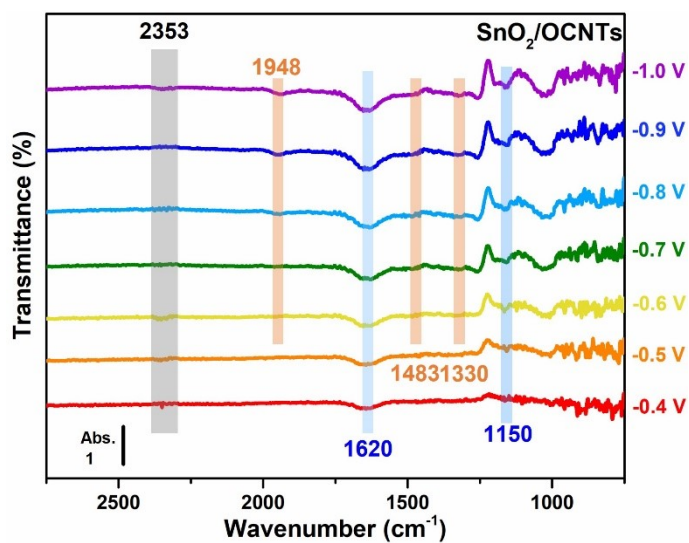

Fig. S7. *In-situ* FT-IR spectra of SnO<sub>2</sub>/OCNTs at different applied potentials.

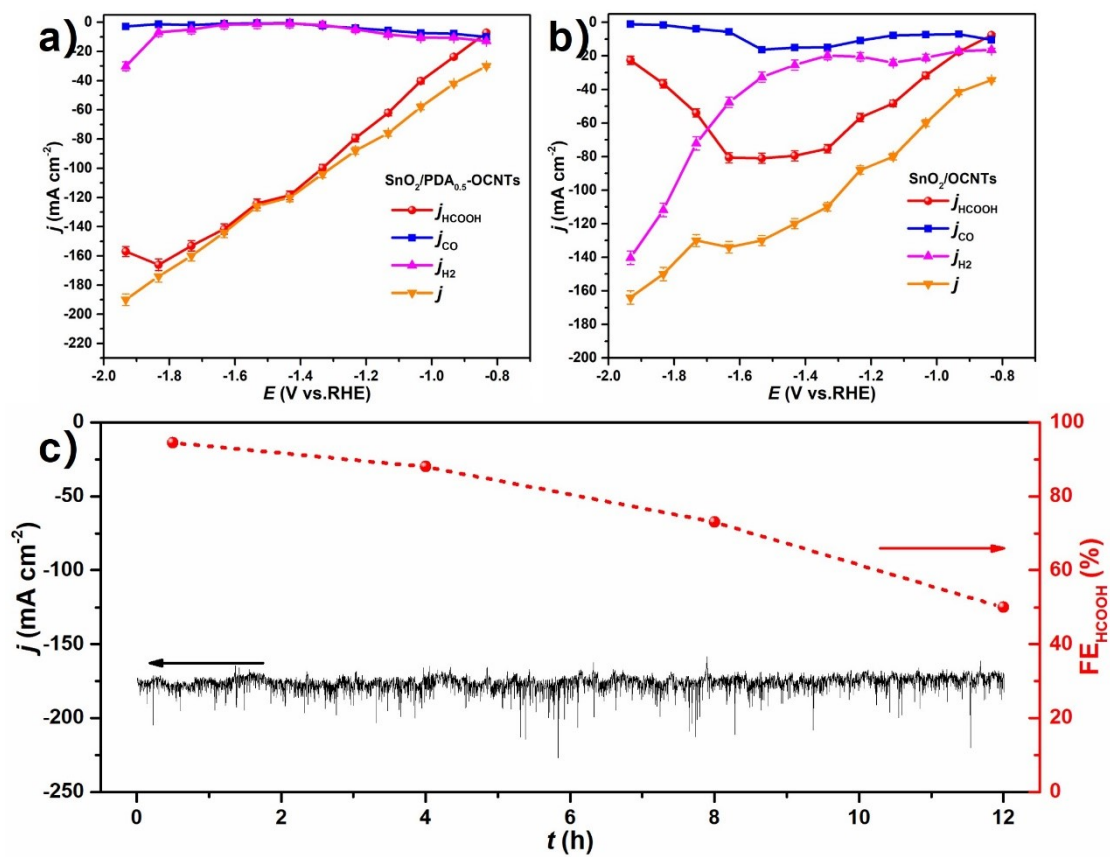

Fig. S8. Current densities over (a)  $\text{SnO}_2/\text{PDA}_{0.5}\text{-OCNTs}$  and (b)  $\text{SnO}_2/\text{OCNTs}$  at different applied potentials. (c) Stability tests over  $\text{SnO}_2/\text{PDA}_{0.5}\text{-OCNTs}$  at -1.83 V in the flow cell with 1 M  $\text{KHCO}_3$ .

Table. S1. The contents of N elements of as-prepared catalysts by XPS

| <b>Samples</b>                               | <b>N content (at.%)</b> |
|----------------------------------------------|-------------------------|
| SnO <sub>2</sub> /OCNTs                      | /                       |
| SnO <sub>2</sub> /PDA <sub>0.25</sub> -OCNTs | 2.62                    |
| SnO <sub>2</sub> /PDA <sub>0.5</sub> -OCNTs  | 3.49                    |
| SnO <sub>2</sub> /PDA <sub>0.75</sub> -OCNTs | 3.93                    |
| SnO <sub>2</sub> /PDA <sub>1</sub> -OCNTs    | 6.64                    |

Table. S2. Contents of elements in the carriers

| <b>Samples</b>             | <b>N content<br/>(at.%)</b> | <b>O content<br/>(at.%)</b> | <b>C content<br/>(at.%)</b> |
|----------------------------|-----------------------------|-----------------------------|-----------------------------|
| OCNTs                      | /                           | 7.09                        | 92.91                       |
| PDA <sub>0.25</sub> -OCNTs | 5.35                        | 7.64                        | 87.01                       |
| PDA <sub>0.5</sub> -OCNTs  | 7.51                        | 8.13                        | 84.36                       |
| PDA <sub>0.75</sub> -OCNTs | 9.45                        | 7.38                        | 83.17                       |
| PDA <sub>1</sub> -OCNTs    | 11.2                        | 4.67                        | 84.13                       |



Table. S3. Summary of the reported CO<sub>2</sub>ER performance over SnO<sub>2</sub>-based electrocatalysts

| Catalysts                                  | Electrolytes             | Potential at FE <sub>max</sub><br>(V vs. RHE) | FE <sub>HCOOH</sub><br>(%) | j <sub>HCOOH</sub><br>(mA cm <sup>-2</sup> ) | Stability<br>(h) | Ref.      |
|--------------------------------------------|--------------------------|-----------------------------------------------|----------------------------|----------------------------------------------|------------------|-----------|
| SnO <sub>2</sub> /PDA <sub>0.5</sub> -CNTO | 0.1 M KHCO <sub>3</sub>  | -1.29                                         | 89                         | -32                                          | 36               | This work |
| SnO <sub>2</sub> /PDA <sub>0.5</sub> -CNTO | 1 M KHCO <sub>3</sub>    | -1.83                                         | 95                         | -166                                         | 12               | This work |
| Vo-rich SnO <sub>2</sub>                   | 0.5 M KHCO <sub>3</sub>  | -1.1                                          | ~ 60                       | -40                                          | 30               | [54]      |
| SnO <sub>2</sub> @N-CNW                    | 0.5 M NaHCO <sub>3</sub> | -0.8                                          | 90                         | -13.5                                        | 20               | [55]      |
| NW-SnO <sub>2</sub>                        | 0.5 M KHCO <sub>3</sub>  | -1.0                                          | 87.4                       | -22                                          | 18               | [56]      |
| SnO <sub>2</sub> ▷NC@EEG                   | 0.1 M KHCO <sub>3</sub>  | -1.2                                          | 81.2                       | -11                                          | 10               | [57]      |
| Sn/CN-0.1                                  | 0.1 M KHCO <sub>3</sub>  | -0.9                                          | 96                         | -3.42                                        | 10               | [58]      |
| SnO <sub>2</sub> nanosheet                 | 0.1 M KHCO <sub>3</sub>  | -1.01                                         | 85                         | -12.75                                       | /                | [59]      |
| mSnO <sub>2</sub> NTs-350                  | 0.5 M KHCO <sub>3</sub>  | -1.3                                          | 90                         | -9                                           | 12               | [60]      |
| VO-rich N-SnO <sub>2</sub> NS              | 0.1 M KHCO <sub>3</sub>  | -0.9                                          | 83                         | ~ -6.7                                       | 10               | [61]      |
| SnO <sub>2</sub> -CNT pH-11                | 0.5 M KHCO <sub>3</sub>  | -0.77                                         | 76                         | ~ -3.5                                       | 10               | [62]      |
| VO-SnO <sub>x</sub> /CF-40                 | 0.1 M KHCO <sub>3</sub>  | -1.0                                          | 86                         | -30                                          | 8                | [63]      |
| CNT#SnO <sub>2</sub> NDs                   | 0.1 M KHCO <sub>3</sub>  | -0.9                                          | 70                         | -5.3                                         | 24               | [64]      |
| SnO <sub>2</sub> /OC                       | 0.1 M KHCO <sub>3</sub>  | -1.0                                          | 75                         | -15                                          | 8                | [65]      |
| NRS-SnO                                    | 1 M KOH                  | -0.7                                          | 87                         | -330                                         | /                | [66]      |
